# Supplementary material
Source: PubMed Central journal article supplement (PMC6730503)
Supplement: CJN.01560219SupplementaryData.pdf [file CJN.01560219SupplementaryData.pdf]

*Supplemental material is neither peer-reviewed nor thoroughly edited by CJASN. The authors alone are responsible for the accuracy and presentation of the material.*

## **Supplemental Material Table of Contents**

**Supplemental Appendix 1.** Administrative codes for identifying treatments, procedures, and additional comorbidities (dialysis, palliative care, intensive procedures, acute hospitalizations and ICU admissions, and comorbidities).

**Supplemental Appendix 2.** Methods for handling missing data (unit nonresponse and item nonresponse).

**Supplemental Table 1.** Unadjusted proportions of end-of-life treatment patterns for overall cohort.

**Supplemental Table 2.** Association of dialysis treatment status with end-of-life treatment patterns.

**Supplemental Table 3.** Comparison of respondent & non-respondent characteristics.

**Supplemental Table 4.** Unadjusted proportions for most favorable responses on Bereaved Family Survey for overall cohort.

**Supplemental Table 5.** Association of dialysis treatment status with most favorable responses on Bereaved Family Survey, additionally adjusted for end-of-life treatment patterns.

**Supplemental Table 6.** Sensitivity analysis of association of end-of-life treatment and dialysis treatment status with excellent overall care: cohort entry after September 2009.

**Supplemental Table 7.** Sensitivity analysis of association of dialysis treatment status with most favorable response on Bereaved Family Survey individual items: cohort entry after September 2009.

**Supplemental Table 8.** Demographic and clinical characteristics of those who died in VA inpatient settings vs. non-VA inpatient or community settings.

*Supplemental material is neither peer-reviewed nor thoroughly edited by CJASN. The authors alone are responsible for the accuracy and presentation of the material.*

**Supplemental Appendix 1.** Administrative codes for identifying treatments, procedures, and additional comorbidities

(dialysis, palliative care, intensive procedures, acute hospitalizations and ICU admissions, and comorbidities).

**a. Dialysis**

*International Classification of Diseases, 9<sup>th</sup> Edition Clinical Modification (ICD9-CM)*

39.95 Hemodialysis

54.98 Peritoneal dialysis

*International Classification of Diseases, 9<sup>th</sup> Edition Procedural Code (ICD9-PCS)*

V45.11 Postsurgical renal dialysis

V45.12 Noncompliance with renal dialysis

V56.0 Adequacy testing for hemodialysis

V56.1 Fitting and adjustment of extracorporeal dialysis catheter

V56.2 Fitting and adjustment of peritoneal dialysis catheter

V56.31 Adequacy testing for hemodialysis

V56.32 Adequacy testing for peritoneal dialysis

V56.8 Adequacy testing for peritoneal dialysis

*Current procedural terminology (CPT) codes*

90921 ESRD related services for recipient 20+ years old

90925 Home dialysis (20 + years old)

90935 Inpatient or outpatient dialysis

90937 Inpatient dialysis or outpatient

90945 Inpatient dialysis or E&M for dialysis patients

90947 Inpatient dialysis or E&M for dialysis patients

90960 Hemoperfusion

90961 Outpatient dialysis (20+ years old)

90962 Outpatient dialysis (20+ years old)

90966 Home dialysis (20+ years old)

90970 Outpatient dialysis (20+ years old)

90997 Hemoperfusion

90999 Unlisted dialysis procedure, inpatient or outpatient

99512 Home visit for hemodialysis

99559 Home infusion of peritoneal dialysis

*Clinic stop codes*

601 Acute dialysis treatment

602 Maintenance assisted hemodialysis

603 Limited self-hemodialysis

604 Home hemodialysis training

605 Acute peritoneal dialysis treatment

606 Maintenance assisted peritoneal dialysis

607 Limited self-peritoneal dialysis

608 Home peritoneal dialysis training

609 Home hemodialysis treatment

610 Contract dialysis

**b. Palliative care**

**Palliative care consultation**

VA clinic stop codes 351 or 353 at a complexity of Level 3 or higher (CPT codes 99241-99245 or 99251-99255) within 90 days of death

Palliative care visits can occur in inpatient or outpatient settings

**Hospice services**

VA bed section 96 or 1F

*Supplemental material is neither peer-reviewed nor thoroughly edited by CJASN. The authors alone are responsible for the accuracy and presentation of the material.*

### **c. Intensive procedures**

#### **Feeding tube placement.**

##### *ICD-9-PCS*

- 43.11 Percutaneous (endoscopic) gastrostomy (PEG)
- 43.19 Feeding tube placement, laparoscopic
- 44.32 Percutaneous (endoscopic) gastrojejunostomy
- 46.32 Percutaneous (endoscopic) jejunostomy (PEJ)
- 46.39 Duodenostomy, feeding enterostomy

##### *CPT codes*

- 43246 Upper GI endoscopy with insertion of the gastrostomy tube
- 43653 Laparoscopy, surgical; gastrostomy, without construction of gastric tube
- 43760 Change of gastrostomy tube without imaging or endoscopic guidance
- 43830 Open Gastrostomy
- 43832 Gastrostomy, open with construction of gastric tube
- 44015 Jejunostomy any method
- 44186 Laparoscopy, surgical; jejunostomy (e.g., for decompression or feeding)
- 44372 Endoscopy with percutaneous jejunostomy placement
- 44373 Conversion of gastrostomy to jejunostomy
- 49440 Insertion of gastrostomy tube, percutaneous
- 49441 Insertion of duodenostomy or jejunostomy tube, percutaneous
- 49446 Conversion of gastrostomy tube to gastrojejunostomy tube
- 49450 Replacement of gastrostomy tube or cecostomy tube
- 49451 Replacement of duodenostomy or jejunostomy
- 49452 Replacement of gastrojejunostomy tube

#### **Enteral or parenteral nutrition**

##### *ICD-9-PCS*

- 96.6 Enteral infusion of concentrated nutritional substances
- 99.15 Parenteral infusion of concentrated nutritional substances

#### **Intubation/mechanical ventilation**

##### *ICD-9-PCS*

- 96.04 Insertion of endotracheal tube
- 96.05 Other intubation of respiratory tract
- 96.7X Continuous invasive mechanical ventilation

#### **Tracheostomy**

##### *ICD-9-PCS*

- 31.1 Temporary tracheostomy
- 31.2 Permanent tracheostomy
- 31.29 Other permanent tracheostomy
- 31.21 Mediastinal tracheostomy

#### **Cardiopulmonary resuscitation**

##### *ICD-9-PCS*

- 99.6 Cardiopulmonary resuscitation, not otherwise specified
- 99.63 Closed chest cardiac massage

### **d. Acute hospitalizations and ICU admissions**

Acute hospitalizations in the VA were identified using medical/surgical bed section codes in the MedSAS inpatient datasets and acute hospitalizations occurring outside the VA were identified using Medicare inpatient claims and VA Fee Basis inpatient authorizations from the VA Corporate Data Warehouse (CDW). Admissions to the ICU were ascertained using bed section codes in the VA and revenue center codes in Medicare institutional claims. It was not possible to determine ICU stays in VA Fee Basis Files.

*Supplemental material is neither peer-reviewed nor thoroughly edited by CJASN. The authors alone are responsible for the accuracy and presentation of the material.*

**e. Comorbidities**

We required at least one inpatient and two outpatient claims during the year before death for a given diagnosis.<sup>1</sup>

**Dementia Diagnosis** (Codes from Fujiyoshi, et al.<sup>23</sup> added to revised Charlson category<sup>22</sup>)

*ICD-9-CM*

- 294.X Persistent mental disorders due to conditions classified elsewhere
- 330.9 Degenerative disease of nervous system, unspecified\*
- 331.0 Alzheimer's disease
- 331.1 Frontotemporal dementia
- 331.82 Dementia with Lewy body
- 331.83 Mild cognitive impairment
- 331.9 Cerebral degeneration unspecified
- 438.0 Cognitive deficits, late effects of cerebrovascular disease
- 780.93 Memory loss

\*Not in original article by Fujiyoshi, et al.<sup>23</sup> but required due to ICD-10 General Equivalence Mappings

**Peripheral vascular disease diagnosis** (Codes from United States Renal Disease System<sup>1</sup> added to revised Charlson diagnostic category<sup>22</sup>)

*ICD-9-CM*

- 443.9 Peripheral vascular disease, unspecified
- 444.0 Embolism and thrombosis of abdominal aorta
- 444.1 Embolism and thrombosis of thoracic aorta
- 444.21 Arterial embolism and thrombosis of upper extremity
- 444.22 Embolism and thrombosis of arteries of the lower extremities
- 444.81 Embolism and thrombosis of iliac artery
- 444.9 Embolism and thrombosis of unspecified artery
- 447 Other disorders of arteries and arterioles
- 557 Vascular insufficiency of intestine

*Supplemental material is neither peer-reviewed nor thoroughly edited by CJASN. The authors alone are responsible for the accuracy and presentation of the material.*

**Supplemental Appendix 2.** Methods for handling missing data (unit nonresponse and item nonresponse).

Survey nonresponse: The propensity to respond was estimated using a logistic regression of a range of variables on the response indicator variable. These propensities were used to form ten adjustment strata. Respondents were then weighted by decile of the inverse of the observed response rate in each strata, referred to as response propensity stratification.<sup>25</sup> This method is less reliant on the correct response propensity model than using the inverse of the response propensity and avoids extreme weighting for very small estimated response propensities.<sup>26</sup> We included variables that were independently associated with survey response at a significance  $P \leq 0.1$ .<sup>26</sup> These included: dialysis treatment status, age, race, gender, relationship of next of kin, the following comorbidities: dementia, diabetes, peptic ulcer, dyslipidemia, hemiplegia paraplegia, any malignancy (not including metastatic solid tumor), congestive heart failure, coronary artery disease, cirrhosis, and venous thromboembolism and pulmonary embolism,<sup>1</sup> quantile of Quan score (revised Charlson score for administrative data),<sup>22</sup> quintile of hospital days in last 90 days, admission to an ICU in last 30 days, and quantile ICU days in last 30 days, indicator for receipt of one or more intensive procedures in the last 30 days, indicator for specific intensive procedures in the last 30 days (including tracheostomy, cardiopulmonary resuscitation, mechanical ventilation, enteral nutrition), palliative care consultation in the last 90 days, hospice services at time of death, setting of death (ICU, acute ward, inpatient hospice or palliative care unit, or VA nursing home), fiscal year of death, region, facility complexity, and bereavement contact after death.

Item nonresponse: To adjust for item non-response (Supplemental Table 4), we used multiple imputation by chained equations (MICE) which fits a series of regression models for each missing variable conditional upon a range of variables. Variables were included if they would theoretically have a relationship with either the global item on the overall quality of care or survey response or were included in subsequent models. These included: all variables included for non-response weighting, in addition to all bereaved family survey items (including three survey items related to benefits not included in as outcomes in our analyses), HIV, peripheral vascular disease, cerebrovascular disease, cardiopulmonary disease, rheumatic disease, metastatic solid tumor, debility or failure to thrive, interaction term between hospice services at death and palliative care consultation in last 90 days, cardiopulmonary resuscitation, feeding tube placement, and quintiles of response probability. MICE was performed with 20 burn-in iterations and 30 imputations. Trace plots of the iterations were examined for convergence and the fraction of missing information and Monte Carlo Error of the estimates were examined to ensure efficiency and reproducibility of all analyzed imputed data.<sup>24</sup>

*Supplemental material is neither peer-reviewed nor thoroughly edited by CJASN. The authors alone are responsible for the accuracy and presentation of the material.*

**Supplemental Table 1.** Unadjusted proportions of end-of-life treatment patterns for overall cohort

| <b>Treatment</b>                     | <b>%</b> |
|--------------------------------------|----------|
| <b>High Intensity Treatment</b>      |          |
| 2+ wks in hospital in last 90 d      | 54       |
| ICU admission in last 30 d           | 47       |
| Intensive procedure in last 30 d     | 34       |
| <b>Setting of death</b>              |          |
| Intensive care unit                  | 31       |
| Acute ward                           | 27       |
| Nursing Home                         | 16       |
| Hospice & palliative care unit       | 26       |
| <b>Palliative &amp; hospice care</b> |          |
| Palliative care consult in last 90 d | 38       |
| Hospice services at time of death    | 36       |

*N* = 9,993

Supplemental material is neither peer-reviewed nor thoroughly edited by CJASN. The authors alone are responsible for the accuracy and presentation of the material.

**Supplemental Table 2.** Association of dialysis treatment status with end-of-life treatment patterns

| Treatment<br>Dialysis Treatment Status | Unadjusted<br>N = 9,993 |                              |            | Adjusted <sup>a</sup><br>N = 9,993 |                              |         |
|----------------------------------------|-------------------------|------------------------------|------------|------------------------------------|------------------------------|---------|
|                                        | %                       | Risk Difference,<br>(95% CI) | P<br>value | %                                  | Risk Difference,<br>(95% CI) | P value |
| <b>High Intensity Treatment</b>        |                         |                              |            |                                    |                              |         |
| 2+ wks in hospital in last 90 d        |                         |                              |            |                                    |                              |         |
| No dialysis                            | 43.7                    | Reference                    |            | 47.4                               | Reference                    |         |
| Acute dialysis                         | 72.2                    | 28.5 (25.3 to 31.8)          | <0.001     | 68.4                               | 21.0 (18.1 to 23.8)          | <0.001  |
| Maintenance dialysis                   | 58.1                    | 14.4 (12.0 to 16.9)          | <0.001     | 53.4                               | 5.9 (3.3 to 8.6)             | <0.001  |
| ICU admission in last 30 d             |                         |                              |            |                                    |                              |         |
| No dialysis                            | 39.6                    | Reference                    |            | 44.0                               | Reference                    |         |
| Acute dialysis                         | 64.4                    | 24.8 (21.5 to 28.1)          | <0.001     | 58.1                               | 14.1 (10.9 to 17.3)          | <0.001  |
| Maintenance dialysis                   | 54.0                    | 14.4 (11.8 to 17.0)          | <0.001     | 48.9                               | 4.9 (2.4 to 7.4)             | <0.001  |
| Intensive procedure in last 30 d       |                         |                              |            |                                    |                              |         |
| No dialysis                            | 24.3                    | Reference                    |            | 29.0                               | Reference                    |         |
| Acute dialysis                         | 57.2                    | 32.9 (29.6 to 36.2)          | <0.001     | 50.2                               | 21.2 (18.3 to 24.1)          | <0.001  |
| Maintenance dialysis                   | 41.8                    | 17.5 (15.3 to 19.7)          | <0.001     | 35.5                               | 6.5 (4.4 to 8.7)             | <0.001  |
| Death in intensive care unit           |                         |                              |            |                                    |                              |         |
| No dialysis                            | 22.6                    | Reference                    |            | 26.8                               | Reference                    |         |
| Acute dialysis                         | 48.8                    | 26.2 (23.0 to 29.4)          | <0.001     | 41.5                               | 14.6 (11.9 to 17.4)          | <0.001  |
| Maintenance dialysis                   | 38.4                    | 15.8 (13.3 to 18.2)          | <0.001     | 32.9                               | 6.0 (3.6 to 8.4)             | <0.001  |
| <b>Palliative and Hospice Care</b>     |                         |                              |            |                                    |                              |         |
| Palliative care consult in last 90 d   |                         |                              |            |                                    |                              |         |
| No dialysis                            | 39.2                    | Reference                    |            | 38.7                               | Reference                    |         |
| Acute dialysis                         | 35.5                    | -3.7 (-7.2 to -0.2)          | 0.04       | 37.6                               | -1.1 (-4.2 to 2.0)           | 0.50    |
| Maintenance dialysis                   | 37.4                    | -1.9 (-4.5 to 0.8)           | 0.17       | 37.5                               | -1.2 (-3.9 to 1.5)           | 0.39    |
| Hospice services at time of death      |                         |                              |            |                                    |                              |         |
| No dialysis                            | 42.9                    | Reference                    |            | 39.2                               | Reference                    |         |
| Acute dialysis                         | 25.1                    | -17.8 (-20.9 to -14.6)       | <0.001     | 30.3                               | -8.9 (-12.0 to -5.8)         | <0.001  |
| Maintenance dialysis                   | 28.9                    | -13.9 (-16.8 to -11.1)       | <0.001     | 32.7                               | -6.6 (-9.6 to -3.5)          | <0.001  |

Logistic regression with no dialysis group as the reference group, standard errors adjusted for facility-level clustering; presented are the predicted probabilities over the distribution of covariates in the analytic sample, 95% CI and P values are for the differences in predicted probabilities; <sup>a</sup>model adjusted for race, age, gender, next of kin, region, facility complexity, year of death, and Charlson individual comorbidities.

Supplemental material is neither peer-reviewed nor thoroughly edited by CJASN. The authors alone are responsible for the accuracy and presentation of the material.

**Supplemental Table 3.** Comparison of respondent & non-respondent characteristics

| <b>Variables</b>                         | <b>Respondents</b> | <b>Non-Respondents</b> | <b>P value</b> |
|------------------------------------------|--------------------|------------------------|----------------|
| Total (%)                                | 5,435 (54)         | 4,558 (46)             | -              |
| Dialysis Treatment Status                |                    |                        | < 0.001        |
| No dialysis                              | 58                 | 51                     |                |
| Acute dialysis                           | 11                 | 12                     |                |
| Maintenance dialysis                     | 31                 | 36                     |                |
| Age, Mean (SD), y                        | 77 (11)            | 74 (11)                | < 0.001        |
| Age group, %                             |                    |                        | < 0.001        |
| <65                                      | 17                 | 23                     |                |
| 65-74                                    | 23                 | 27                     |                |
| 75-84                                    | 31                 | 27                     |                |
| 85+                                      | 29                 | 22                     |                |
| Male sex, %                              | 98                 | 97                     | 0.07           |
| Race, %                                  |                    |                        | < 0.001        |
| Black                                    | 22                 | 29                     |                |
| White                                    | 76                 | 69                     |                |
| Other                                    | 2                  | 3                      |                |
| Next of Kin, %                           |                    |                        | < 0.001        |
| Spouse/partner                           | 47                 | 32                     |                |
| Child                                    | 31                 | 40                     |                |
| Sibling                                  | 10                 | 12                     |                |
| Other                                    | 12                 | 16                     |                |
| Comorbidities, %                         |                    |                        |                |
| Diabetes Mellitus <sup>a</sup>           | 63                 | 65                     | 0.04           |
| Congestive Heart Failure                 | 67                 | 65                     | 0.02           |
| Myocardial Infarction                    | 28                 | 27                     | 0.35           |
| Emphysema                                | 54                 | 56                     | 0.09           |
| Cirrhosis <sup>a</sup>                   | 17                 | 21                     | < 0.001        |
| Cerebrovascular Disease                  | 32                 | 33                     | 0.54           |
| Peripheral Vascular Disease <sup>b</sup> | 42                 | 43                     | 0.47           |
| Dementia <sup>b</sup>                    | 22                 | 20                     | 0.03           |
| Cancer <sup>a</sup>                      | 36                 | 35                     | 0.21           |
| Region, %                                |                    |                        | 0.17           |
| New England                              | 3                  | 3                      |                |
| Mid Atlantic                             | 15                 | 15                     |                |
| East North Central                       | 13                 | 12                     |                |
| West North Central                       | 9                  | 8                      |                |
| South Atlantic                           | 23                 | 23                     |                |
| East South Central                       | 8                  | 8                      |                |
| West South Central                       | 11                 | 11                     |                |
| Mountain                                 | 7                  | 7                      |                |
| Pacific                                  | 11                 | 13                     |                |
| Facility Complexity, %                   |                    |                        | < 0.001        |
| High (Level 1a, 1b, 1c)                  | 86                 | 89                     |                |
| Low (Level 2, 3)                         | 14                 | 11                     |                |

<sup>a</sup>includes both Charlson diagnostic categories of mild and severe; <sup>b</sup>diagnostic categories expanded (Supplemental Appendix 1)



*Supplemental material is neither peer-reviewed nor thoroughly edited by CJASN. The authors alone are responsible for the accuracy and presentation of the material.*

**Supplemental Table 4.** Unadjusted proportions for most favorable responses on Bereaved Family Survey for overall cohort

|                                                                | <b>% Most Favorable Response<sup>a</sup></b> | <b>% Missing of N = 5,435</b> |
|----------------------------------------------------------------|----------------------------------------------|-------------------------------|
| Overall rating of patient’s care in the last month of life, %  | 55                                           | 2                             |
| Staff willing to take time to listen, %                        | 71                                           | 3                             |
| Staff provided the treatment that patient and family wanted, % | 77                                           | 4                             |
| Staff were kind, caring, respectful, %                         | 80                                           | 2                             |
| Staff kept patient and family informed, %                      | 67                                           | 2                             |
| Personal care needs were taken care of, %                      | 63                                           | 5                             |
| Provided patient and family spiritual support, %               | 59                                           | 4                             |
| Provided patient and family emotional support before death, %  | 60                                           | 3                             |
| Provided patient and family emotional support after death, %   | 66                                           | 4                             |
| Staff alerted family before the patient's death, %             | 81                                           | 9                             |
| Patient did not have pain, %                                   | 13                                           | 9                             |
| Patient usually not uncomfortable from pain, % <sup>b</sup>    | 50                                           | 17                            |

<sup>a</sup>Dichotomized as most favorable response vs. all other responses; <sup>b</sup>pain item was dichotomized as “always” or “usually” vs. all other responses (including patients who did not have pain)

Supplemental material is neither peer-reviewed nor thoroughly edited by CJASN. The authors alone are responsible for the accuracy and presentation of the material.

**Supplemental Table 5.** Association of dialysis treatment status with most favorable responses on Bereaved Family Survey, additionally adjusted for end-of-life treatment patterns

| <b>Bereaved Family Survey Item<sup>a</sup></b><br><b>Dialysis Treatment Status</b> | %    | Risk Difference,<br>(95% CI) | P value |
|------------------------------------------------------------------------------------|------|------------------------------|---------|
| <b>Excellent overall care</b>                                                      |      |                              |         |
| No dialysis                                                                        | 54.3 | Reference                    |         |
| Acute dialysis                                                                     | 54.8 | 0.6 (-4.5 to 5.6)            | 0.83    |
| Maintenance dialysis                                                               | 51.1 | -3.2 (-6.7 to 0.3)           | 0.07    |
| <b>Always took time to listen</b>                                                  |      |                              |         |
| No dialysis                                                                        | 70.7 | Reference                    |         |
| Acute dialysis                                                                     | 71.5 | 0.8 (-3.2 to 4.8)            | 0.69    |
| Maintenance dialysis                                                               | 67.4 | -3.3 (-6.3 to -0.2)          | 0.04    |
| <b>Always gave wanted medication and treatment</b>                                 |      |                              |         |
| No dialysis                                                                        | 76.1 | Reference                    |         |
| Acute dialysis                                                                     | 76.5 | 0.4 (-3.5 to 4.3)            | 0.84    |
| Maintenance dialysis                                                               | 73.6 | -2.6 (-5.5 to 0.4)           | 0.09    |
| <b>Always kind, caring, respectful</b>                                             |      |                              |         |
| No dialysis                                                                        | 80.3 | Reference                    |         |
| Acute dialysis                                                                     | 80.0 | -0.3 (-4.5 to 3.9)           | 0.89    |
| Maintenance dialysis                                                               | 77.1 | -3.2 (-6.4 to -0.0)          | 0.048   |
| <b>Always informed patient and family</b>                                          |      |                              |         |
| No dialysis                                                                        | 66.0 | Reference                    |         |
| Acute dialysis                                                                     | 67.9 | 1.9 (-2.5 to 6.2)            | 0.40    |
| Maintenance dialysis                                                               | 64.3 | -1.7 (-4.9 to 1.6)           | 0.31    |
| <b>Always attended to personal care needs</b>                                      |      |                              |         |
| No dialysis                                                                        | 63.1 | Reference                    |         |
| Acute dialysis                                                                     | 59.6 | -3.5 (-9.0 to 1.9)           | 0.21    |
| Maintenance dialysis                                                               | 60.3 | -2.7 (-6.3 to 0.8)           | 0.13    |
| <b>Always gave enough spiritual support</b>                                        |      |                              |         |
| No dialysis                                                                        | 59.2 | Reference                    |         |
| Acute dialysis                                                                     | 57.9 | -1.4 (-6.8 to 4.1)           | 0.63    |
| Maintenance dialysis                                                               | 56.8 | -2.5 (-5.9 to 0.9)           | 0.15    |
| <b>Always gave enough emotional support before death</b>                           |      |                              |         |
| No dialysis                                                                        | 59.7 | Reference                    |         |
| Acute dialysis                                                                     | 56.3 | -3.4 (-8.1 to 1.3)           | 0.16    |
| Maintenance dialysis                                                               | 58.8 | -0.9 (-4.5 to 2.6)           | 0.62    |
| <b>Always gave enough emotional support after death</b>                            |      |                              |         |
| No dialysis                                                                        | 65.4 | Reference                    |         |
| Acute dialysis                                                                     | 66.8 | 1.4 (-3.9 to 6.6)            | 0.60    |
| Maintenance dialysis                                                               | 64.3 | -1.1 (-4.9 to 2.6)           | 0.56    |
| <b>Alerted family before the patient's death</b>                                   |      |                              |         |
| No dialysis                                                                        | 82.0 | Reference                    |         |
| Acute dialysis                                                                     | 80.1 | -1.9 (-6.4 to 2.6)           | 0.41    |
| Maintenance dialysis                                                               | 78.4 | -3.6 (-6.8 to -0.4)          | 0.03    |
| <b>Patient's usually not uncomfortable from pain<sup>b</sup></b>                   |      |                              |         |
| No dialysis                                                                        | 49.1 | Reference                    |         |
| Acute dialysis                                                                     | 52.9 | 3.8 (-1.2 to 8.9)            | 0.14    |
| Maintenance dialysis                                                               | 47.2 | -1.9 (-5.5 to 1.7)           | 0.31    |

Logistic regression with no dialysis group as the reference, standard errors adjusted for facility-level clustering; presented are predicted probabilities over the distribution of covariates in the respondent sample, 95% CI and P values are for differences in predicted probabilities; model adjusted for race, age, gender, next of kin, region, facility complexity, year of death, Charlson individual comorbidities, 2+ wks spent in hospital in last 90 d, ICU admission in last 30 d, intensive procedure in last 30 d, setting of death (ICU, acute ward, nursing home, inpatient or palliative care unit), palliative care services in last 90 d, hospice services at time of death, weighted for unit non-response, and missing items were imputed; <sup>a</sup>dichotomized as most favorable response vs. all other responses <sup>b</sup>pain was dichotomized as “never” or “sometimes” vs. “always” or “usually”

Supplemental material is neither peer-reviewed nor thoroughly edited by CJASN. The authors alone are responsible for the accuracy and presentation of the material.

To address the possibility that survival bias may impact our findings, we additionally performed a sensitivity analysis for the relationship between the end-of-life treatment patterns, dialysis treatment status, and most favorable response on the BFS. We restricted the cohort entry to begin the same date as when Bereaved Family results were available (October 1, 2009). This sensitivity analysis included 5,971 cohort members, of whom 3,935 (66%) did not receive dialysis, 863 (14%) received acute dialysis and 1,173 (20%) received maintenance dialysis. The median time from cohort entry to death was 20.0 months (IQR, 8.2 to 35.0) for those treated with maintenance dialysis, 3.6 months (IQR, 0.7 to 12.3) for those who received acute dialysis, and 3.5 months (IQR, 0.4 to 14.0) for those not treated with dialysis. For maintenance dialysis, the median time from onset of end-stage kidney disease to the date of death was 16.2 months (IQR, 7.3 to 31.0). Overall, 3,227 (54%) completed the survey. Tables S6-S7 include the results from the sensitivity analysis.

**Supplemental Table 6.** Sensitivity analysis of association of end-of-life treatment and dialysis treatment status with excellent overall care: cohort entry after September 2009

| Treatment <sup>a</sup>               | Unadjusted<br>(N = 3,072) <sup>b</sup> |                           |         | Adjusted<br>(N = 3,227) <sup>b,c</sup> |                           |         |
|--------------------------------------|----------------------------------------|---------------------------|---------|----------------------------------------|---------------------------|---------|
|                                      | Yes (%)                                | Risk Difference, (95% CI) | P value | Yes (%)                                | Risk Difference, (95% CI) | P value |
| <b>Dialysis Treatment Status</b>     |                                        |                           |         |                                        |                           |         |
| No Dialysis                          | 51.0                                   | Reference                 |         | 55.8                                   | Reference                 |         |
| Acute dialysis                       | 48.8                                   | -2.2 (-7.9 to 3.6)        | 0.46    | 53.4                                   | -2.5 (-8.0 to 3.1)        | 0.38    |
| Maintenance dialysis                 | 42.7                                   | -8.2 (-12.9 to -3.6)      | <0.001  | 51.2                                   | -4.5 (-9.4 to 0.3)        | 0.06    |
| <b>High Intensity Treatment</b>      |                                        |                           |         |                                        |                           |         |
| 2+ wks in hospital in last 90 d      |                                        |                           |         |                                        |                           |         |
| No                                   | 60.1                                   | Reference                 |         | 57.6                                   | Reference                 |         |
| Yes                                  | 51.5                                   | -8.6 (-12.0 to -5.3)      | <0.001  | 51.7                                   | -5.8 (-9.6 to -2.1)       | 0.002   |
| ICU admission in last 30 d           |                                        |                           |         |                                        |                           |         |
| No                                   | 58.1                                   | Reference                 |         | 55.5                                   | Reference                 |         |
| Yes                                  | 53.4                                   | -4.7 (-8.2 to -1.2)       | 0.009   | 53.5                                   | -2.0 (-5.7 to 1.8)        | 0.31    |
| Intensive procedure in last 30 d     |                                        |                           |         |                                        |                           |         |
| No                                   | 58.3                                   | Reference                 |         | 56.0                                   | Reference                 |         |
| Yes                                  | 50.5                                   | -7.7 (-11.9 to -3.6)      | <0.001  | 51.5                                   | -4.5 (-8.8 to -0.2)       | 0.04    |
| Death in intensive care unit         |                                        |                           |         |                                        |                           |         |
| No                                   | 58.4                                   | Reference                 |         | 56.3                                   | Reference                 |         |
| Yes                                  | 49.3                                   | -9.2 (-13.4 to -5.0)      | <0.001  | 50.5                                   | -5.8 (-10.4 to -1.3)      | 0.01    |
| <b>Palliative and Hospice Care</b>   |                                        |                           |         |                                        |                           |         |
| Palliative care consult in last 90 d |                                        |                           |         |                                        |                           |         |
| No                                   | 54.3                                   | Reference                 |         | 52.9                                   | Reference                 |         |
| Yes                                  | 58.2                                   | 3.9 (0.6 to 7.1)          | 0.02    | 56.7                                   | 3.8 (0.3 to 7.2)          | 0.03    |
| Hospice services at time of death    |                                        |                           |         |                                        |                           |         |
| No                                   | 50.0                                   | Reference                 |         | 49.4                                   | Reference                 |         |
| Yes                                  | 64.5                                   | 14.5 (10.3 to 18.6)       | <0.001  | 62.8                                   | 13.4 (9.0 to 17.8)        | <0.001  |

Logistic regression with no dialysis as reference group for acute and maintenance dialysis and no receipt as reference group for end-of-life treatment variables, standard errors adjusted for facility-level clustering; presented are the predicted probabilities over the distribution of covariates in the respondent sample, 95% CI and P values are for the differences in predicted probabilities; <sup>a</sup>dichotomized as “excellent” vs. all other responses; <sup>b</sup>denominators differ between unadjusted and adjusted models; <sup>c</sup>missing items were imputed, model adjusted for race, age, gender, next of kin, region, facility complexity, year of death, and individual Charlson comorbidities, standard errors adjusted for facility-level clustering, weighted for unit non-response.

Supplemental material is neither peer-reviewed nor thoroughly edited by CJASN. The authors alone are responsible for the accuracy and presentation of the material.

**Supplemental Table 7.** Sensitivity analysis of association of dialysis treatment status with most favorable response on Bereaved Family Survey individual items: cohort entry after September 2009

| Bereaved Family Survey Item <sup>a</sup>                         | Unadjusted <sup>b</sup> |                           |         | Adjusted (N = 3,227) <sup>c</sup> |                           |         |
|------------------------------------------------------------------|-------------------------|---------------------------|---------|-----------------------------------|---------------------------|---------|
|                                                                  | %                       | Risk Difference, (95% CI) | P value | %                                 | Risk Difference, (95% CI) | P value |
| <b>Dialysis Treatment Status</b>                                 |                         |                           |         |                                   |                           |         |
| <b>Always took time to listen</b>                                |                         |                           |         |                                   |                           |         |
| No dialysis                                                      | 73.6                    | Reference                 |         | 71.2                              | Reference                 |         |
| Acute dialysis                                                   | 69.3                    | -4.2 (-9.1 to 0.7)        | 0.09    | 70.7                              | -0.5 (-5.6 to 4.6)        | 0.85    |
| Maintenance dialysis                                             | 65.1                    | -8.5 (-13.4 to -3.5)      | <0.001  | 65.7                              | -5.5 (-11.0 to 0.0)       | 0.05    |
| <b>Always gave wanted medication and treatment</b>               |                         |                           |         |                                   |                           |         |
| No dialysis                                                      | 79.0                    | Reference                 |         | 76.3                              | Reference                 |         |
| Acute dialysis                                                   | 72.6                    | -6.4 (-10.6 to -2.1)      | 0.003   | 74.6                              | -1.7 (-6.3 to 2.8)        | 0.46    |
| Maintenance dialysis                                             | 71.8                    | -7.2 (-11.3 to -3.1)      | <0.001  | 72.3                              | -4.0 (-9.0 to 1.0)        | 0.11    |
| <b>Always kind, caring, respectful</b>                           |                         |                           |         |                                   |                           |         |
| No dialysis                                                      | 82.9                    | Reference                 |         | 80.5                              | Reference                 |         |
| Acute dialysis                                                   | 76.9                    | -6.0 (-10.6 to -1.4)      | 0.01    | 78.1                              | -2.4 (-7.3 to 2.5)        | 0.34    |
| Maintenance dialysis                                             | 75.4                    | -7.5 (-11.9 to -3.1)      | <0.001  | 76.7                              | -3.8 (-8.6 to 1.0)        | 0.13    |
| <b>Always informed patient and family</b>                        |                         |                           |         |                                   |                           |         |
| No dialysis                                                      | 69.3                    | Reference                 |         | 66.8                              | Reference                 |         |
| Acute dialysis                                                   | 65.9                    | -3.4 (-8.1 to 1.4)        | 0.17    | 67.7                              | 0.9 (-4.2 to 5.9)         | 0.74    |
| Maintenance dialysis                                             | 62.7                    | -6.5 (-11.4 to -1.7)      | 0.008   | 65.1                              | -1.7 (-6.9 to 3.5)        | 0.52    |
| <b>Always attended to personal care needs</b>                    |                         |                           |         |                                   |                           |         |
| No dialysis                                                      | 65.9                    | Reference                 |         | 63.0                              | Reference                 |         |
| Acute dialysis                                                   | 58.9                    | -7.1 (-13.4 to -0.7)      | 0.03    | 58.9                              | -4.2 (-10.9 to 2.6)       | 0.23    |
| Maintenance dialysis                                             | 57.2                    | -8.7 (-14.0 to -3.5)      | 0.001   | 60.8                              | -2.3 (-7.7 to 3.2)        | 0.42    |
| <b>Always gave enough spiritual support</b>                      |                         |                           |         |                                   |                           |         |
| No dialysis                                                      | 65.9                    | Reference                 |         | 60.2                              | Reference                 |         |
| Acute dialysis                                                   | 58.9                    | -7.1 (-13.4 to -0.7)      | 0.05    | 57.7                              | -2.5 (-8.9 to 3.9)        | 0.45    |
| Maintenance dialysis                                             | 57.2                    | -8.7 (-14.0 to -3.5)      | <0.001  | 55.7                              | -4.5 (-9.3 to 0.2)        | 0.06    |
| <b>Always gave enough emotional support before death</b>         |                         |                           |         |                                   |                           |         |
| No dialysis                                                      | 63.3                    | Reference                 |         | 60.2                              | Reference                 |         |
| Acute dialysis                                                   | 52.9                    | -10.4 (-15.9 to -4.9)     | <0.001  | 54.8                              | -5.5 (-11.2 to 0.3)       | 0.06    |
| Maintenance dialysis                                             | 54.2                    | -9.1 (-13.9 to -4.3)      | <0.001  | 56.6                              | -3.6 (-8.7 to 1.5)        | 0.17    |
| <b>Always gave enough emotional support after death</b>          |                         |                           |         |                                   |                           |         |
| No dialysis                                                      | 68.7                    | Reference                 |         | 66.6                              | Reference                 |         |
| Acute dialysis                                                   | 62.7                    | -6.0 (-11.4 to -0.6)      | 0.03    | 65.2                              | -1.4 (-7.4 to 4.6)        | 0.65    |
| Maintenance dialysis                                             | 63.3                    | -5.4 (-10.5 to -0.3)      | 0.04    | 65.2                              | -1.4 (-6.7 to 3.9)        | 0.61    |
| <b>Alerted family before the patient's death</b>                 |                         |                           |         |                                   |                           |         |
| No dialysis                                                      | 82.6                    | Reference                 |         | 82.6                              | Reference                 |         |
| Acute dialysis                                                   | 82.0                    | -0.6 (-4.9 to 3.7)        | 0.77    | 82.8                              | 0.3 (-4.5 to 5.0)         | 0.92    |
| Maintenance dialysis                                             | 80.1                    | -2.6 (-6.5 to 1.4)        | 0.20    | 79.4                              | -3.1 (-7.6 to 1.3)        | 0.17    |
| <b>Patient's usually not uncomfortable from pain<sup>d</sup></b> |                         |                           |         |                                   |                           |         |
| No dialysis                                                      | 51.0                    | Reference                 |         | 48.3                              | Reference                 |         |
| Acute dialysis                                                   | 48.8                    | -2.2 (-7.9 to 3.6)        | 0.46    | 51.9                              | 3.6 (-3.0 to 10.2)        | 0.28    |
| Maintenance dialysis                                             | 42.7                    | -8.2 (-12.9 to -3.6)      | <0.001  | 46.7                              | -1.7 (-6.8 to 3.5)        | 0.53    |

Logistic regression with no dialysis group as the reference, standard errors adjusted for facility-level clustering; presented are the predicted probabilities over the distribution of covariates in the respondent sample; 95% CI and P values are for differences in the predicted probabilities; <sup>a</sup>dichotomized as most favorable response vs. all other responses, <sup>b</sup>denominators vary due to missing items (Supplemental Table 3), <sup>c</sup>missing items were imputed, model adjusted for race, age, gender, next of kin, region, facility complexity, year of death, and individual Charlson comorbidities, and weighted for unit non-response. <sup>d</sup>pain was dichotomized as “never” or “sometimes” vs. “always” or “usually”

Supplemental material is neither peer-reviewed nor thoroughly edited by CJASN. The authors alone are responsible for the accuracy and presentation of the material.

**Supplemental Table 8.** Demographic and clinical characteristics of those who died in VA inpatient settings vs. non-VA inpatient or community settings.

| <b>Variables</b>                         | <b>Died in VA<br/>Inpatient Settings</b> | <b>Died in Non-VA<br/>Inpatient or<br/>Community Settings</b> |
|------------------------------------------|------------------------------------------|---------------------------------------------------------------|
| Total (%)                                | 10,800 (20)                              | 43,522 (80)                                                   |
| Age, Mean (SD), y                        | 75 (11)                                  | 76 (11)                                                       |
| Age group, %                             |                                          |                                                               |
| <65                                      | 20                                       | 17                                                            |
| 65-74                                    | 26                                       | 23                                                            |
| 75-84                                    | 29                                       | 31                                                            |
| 85+                                      | 25                                       | 28                                                            |
| Male sex, %                              | 98                                       | 98                                                            |
| Race, %                                  |                                          |                                                               |
| Black                                    | 25                                       | 20                                                            |
| White                                    | 72                                       | 77                                                            |
| Other                                    | 2                                        | 2                                                             |
| Unknown                                  | 1                                        | 1                                                             |
| Dialysis Treatment Status, %             |                                          |                                                               |
| No dialysis                              | 53                                       | 42                                                            |
| Acute dialysis                           | 11                                       | 4                                                             |
| Maintenance dialysis                     | 36                                       | 53                                                            |
| Comorbidities, %                         |                                          |                                                               |
| Diabetes <sup>a</sup>                    | 64                                       | 66                                                            |
| Congestive Heart Failure                 | 66                                       | 69                                                            |
| Myocardial Infarction                    | 27                                       | 29                                                            |
| Chronic Obstructive Pulmonary Disease    | 54                                       | 50                                                            |
| Liver Disease <sup>a</sup>               | 19                                       | 15                                                            |
| Cerebrovascular Disease                  | 32                                       | 33                                                            |
| Peripheral Vascular Disease <sup>b</sup> | 42                                       | 46                                                            |
| Dementia <sup>b</sup>                    | 21                                       | 21                                                            |
| Cancer <sup>a</sup>                      | 36                                       | 28                                                            |

<sup>a</sup>Includes both Charlson diagnostic categories of mild and severe; <sup>b</sup>diagnostic categories expanded (Supplemental Appendix 1)
